# Supplementary material
Source: PubMed Central journal article supplement (PMC3930919)
Supplement: NIHMS551030-supplement-Supp_Fig_S1.pdf [file NIHMS551030-supplement-Supp_Fig_S1.pdf]

## Figure 1S – Formin Alignment with Primers

|       |     |                                                                                    |     |
|-------|-----|------------------------------------------------------------------------------------|-----|
| DIA1  | 1   | ME-----PPGGSLGPG---RGTDRKK---KGRSPDELPSAGGDGGKSK---KFTLKRMLADELERFTSMRI            | 57  |
| DIA2  | 1   | MERHQPRLLHHPAQGSAAGTPYPSSASLRGCRESKMPRRKGPQHPPPSGPEEPGEKRPKPHLNIRTLTDDMLDKFASIRI   | 80  |
| DIA3  | 1   | ME--QPGA--AASGAGGSEEPG----GGRSNK--RSAGNR-----AANEETKKNPKLNIQIKTLADDVDRDRITSFRK     | 64  |
| DAAM1 |     | -----M                                                                             |     |
| DAAM2 |     | -----M                                                                             |     |
| FRL1  |     | -----                                                                              |     |
| FRL2  |     | -----                                                                              |     |
| FRL3  |     | -----                                                                              |     |
| WHIF1 |     | -----                                                                              |     |
| INF1  |     | -----                                                                              |     |
| FHOD1 |     | -----M                                                                             |     |
| FHOD3 |     | -----                                                                              |     |
| DELPH |     | -----                                                                              |     |
| FMN1  |     | -----                                                                              |     |
| FMN2  |     | -----                                                                              |     |
|       |     |                                                                                    |     |
| DIA1  | 58  | K-KEKEKPNSAH-RNSSASYGDDPTAQ-----SLQDVSDEQVVLVLFQMLLDMNLNEEKQQPLREKDI I             | 119 |
| DIA2  | 81  | PGSKKERPPLPN-LKTAFASDDCSAAPLEM-----MENFPKPLSENELELEFEKMMEDMNLNEDKKAPLREKDFS        | 149 |
| DIA3  | 65  | STVKKEKPLIQHPIDSQVAMSEFPAAQ-PL-----YDERSLNLSEKEVLDLFEKMMEDMNLNEEKKAPLRNKDFT        | 133 |
| DAAM1 | 2   | APRRKGGRGISF-IFCCFRNNDHPEITYRLRNDNFALQTMEPALPMPVVEELDVMFSELVDELDTDKHREAMFALPAE     | 80  |
| DAAM2 | 2   | APRRKSHHGLGF-L-CCFGSDIPEINLR----DNHPLQFMFESSPI PNAEELNIRFAELVDELDTDKNREAMFALPPE    | 75  |
| FRL1  | 1   | -----MGNAGSAEQPAGPAAP---PPKQPAPP-KQMPAAGELEERFNALNCMNLPPDKVQLLSQYDNE               | 62  |
| FRL2  | 1   | -----MGNAGSMDSQQDFRAH----NVPL-----KLPMPPEPGELEERFAIVLNAMNLPPDKARLLRQYDNE           | 58  |
| FRL3  | 1   | -----MGNLESAEGVPGE--PP---SVPLLLPPGKMPPEPCELEERFALVLSMNLPPDKARLLRQYDNE              | 61  |
| WHIF1 | 1   | -----MSVKEGAQ                                                                      | 8   |
| INF1  |     | -----                                                                              |     |
| FHOD1 | 2   | AGGEDRGDGEVPSVVTVRVQYLEDTPDFACAN-FPEP-----RRAPTCSLD-----GALPLGAQIPAVHRLLGAP        | 65  |
| FHOD3 | 1   | -----MATLACRVQFLDDTDPFNSTN-FPEP-----SRPPLFTFR-----EDLALGTQLAGVHRLQAP               | 53  |
| DELPH | 1   | -----MATTATPATNQG-WPEDFGFRLGGSGPCFVLEVAKGSSAHAGGLRPGDQILEVEGLAVGG                  | 59  |
| FMN1  |     | -----                                                                              |     |
| FMN2  |     | -----                                                                              |     |
|       |     |                                                                                    |     |
| DIA1  | 120 | IKREMVSQYLYTSKAGMSQKESK---SAMMYIQELRSGLRDMPLLS---C-----LE-SLRV                     | 170 |
| DIA2  | 150 | IKKEMVMQYINTASKTGLKRSRQ---ISPQEFHELKMGSADELRVT---C-----LE-SLRV                     | 201 |
| DIA3  | 134 | TKREMVVQYISATAKSGGLKNSKHECTLSSQEVHELRSGISDEKLLN---C-----LE-SLRV                    | 188 |
| DAAM1 | 81  | KKWQIYCSKKKQEE-NKGATSWP-----EFYIDQLNSMAARKSLLA---LE-----KEEEEEERSKTIE-SLKT         | 139 |
| DAAM2 | 76  | KKWQIYCSKKKEQEDPNKLATSWP-----DYIIDRINSMAAMQSLYA---FD-----EETEEMRNQVVE-DLKT         | 135 |
| FRL1  | 63  | KKWELICQERFQVK-----NP-----PAAIYQKLSYVDTGGVSR--KVAADWMSNLGFKRRVQESTQVLR-ELET        | 126 |
| FRL2  | 59  | KKWELICQERFQVK-----NP-----PHTYIQKLGYLDPVAVTRK--K-----FRRRVQESTQVLR-ELEI            | 112 |
| FRL3  | 62  | KKWDLICQERFQVK-----NP-----PHTYIQKLSQFLDPSVTRK--K-----FRRRVQESTQVLR-ELEI            | 115 |
| WHIF1 | 9   | RKWAALKEKLGPDSDPTEANLES-----ADPELCIR--LLQMPSVVN-----YS-GLRK                        | 55  |
| INF1  |     | -----                                                                              |     |
| FHOD1 | 66  | LKLEDICALQVSPSGYYLDELSELEEQREMLEGFYEEISKGRKPTLILRTQLSVRVNAILEKLYSSSGPELRRSLF-SLK-  | 143 |
| FHOD3 | 54  | HKLDDCTLQLSHNGAYLDLEATLAEQRDELEGFQDDAGRGKHSIILRTQLSVRVHACIEKLYNSSGRDLRRALF-SLK-    | 131 |
| DELPH | 60  | LSRER-LVRLARRCPRVPPSLGVLPA PD--GGPGPGSGPAAPTTLVLRAPRCGRGLALGRELLRLAGKRKRPDAVHRERR- | 134 |
| FMN1  |     | -----                                                                              |     |
| FMN2  |     | -----                                                                              |     |
|       |     |                                                                                    |     |
| DIA1  | 171 | SLNNNPVSWVQTFGA-E--GLASLLDILKRLHDEKEETAGSYDSRNKHE-----                             | 216 |
| DIA2  | 202 | SLTSNPVSWVESFGH-E--GLGLLLDILEKLI SGKIQE--KVVKKNQHK-----                            | 245 |
| DIA3  | 189 | SLTSNPVSWVNNFGH-E--GLGLLLDELEKLLDKKQE--NIDKKNQYK-----                              | 232 |
| DAAM1 | 140 | ALRTKPMRFVTRFIDL--GLSCILNFLKTM DYETSES-----RIHTS-----                              | 180 |
| DAAM2 | 136 | ALRTQPMRFVTRFIELE--GLTCLLNFLRSM DHATCES-----RIHTS-----                             | 176 |
| FRL1  | 127 | SLRTNHIGWVQEFVFLNEENRGLDVLLEYLAFAQCSVTYDMESTDNGASNS-EKNKPLEQSVEDLSKGPSSVP-----K    | 198 |
| FRL2  | 113 | SLRTNHIGWVREFLNEENKGLDVLVEYLSFAQYAVTFDFESVESTVESVDKSKPWSRSIEDLHRGNSLSPVGNVSRS      | 192 |
| FRL3  | 116 | SLRTNHIGWVREFLNDENKGLDVLVDYLSFAQCSVMFDFEGLESDDGAFDKLRSWSRSIEDLQPPSALSAPFTNSLARS    | 195 |
| WHIF1 | 56  | RLEGSDDGWMVQFLEQS--GLDLLLEALARLSGRGVARI--SDALLQLT-----                             | 100 |
| INF1  |     | -----                                                                              |     |
| FHOD1 | 144 | QIFQEDKDLVPEFVHSE--GLSCLIRVGAAADHNYQSY-----                                        | 179 |
| FHOD3 | 132 | QIFQDDKDLVHEFVVAE--GLTCLIKVGAEADQNYQNY-----                                        | 167 |
| DELPH | 135 | RKAQEF SRKVD EILGDQ--PTA-----KEQ-----                                              | 157 |
| FMN1  |     | -----                                                                              |     |
| FMN2  |     | -----                                                                              |     |

|       |     |                                                                                   |     |
|-------|-----|-----------------------------------------------------------------------------------|-----|
| DIA1  | 217 | -----IIRCLKAFMNNKFGIKTMLETEEGILLVLRAMPVAVPMMIDAAKLLSA                             | 265 |
| DIA2  | 246 | -----VIQCLKALMNTQYGLERIMSEERSLSLLAKAVDPRHPNMMDTVVKLLSA                            | 294 |
| DIA3  | 233 | -----LIQCLKAFMNNKFLQRIILGDEERSLLLRADIPKQPNMTEIVKILSA                              | 281 |
| DAAM1 | 181 | -----LIGCIKALMNNNSQGRAHVLAHSESINVIQAQSLSTENIKTKVAVLEILGA                          | 229 |
| DAAM2 | 177 | -----LIGCIKALMNNNSQGRAHVLAQPEAISTIAQSLRTENSKTKVAVLEILGA                           | 225 |
| FRL1  | 199 | SRHLTIKLTPAHSRKALRNSRIVSQKDDVHVCIMCLRAIMNYQSGFSLVMNHPACVNEIALSLNNKNPRTKALVLELLAA  | 278 |
| FRL2  | 193 | GRHSALRYNTLPSRRTLKNSRSLVSKDDVHVCIMCLRAIMNYQYGFNMVMSHPHAVNEIALSLNNKNPRTKALVLELLAA  | 272 |
| FRL3  | 196 | ARQSVLRYSTLPGRRALKNSRSLVSKDDVHVCILCLRAIMNYQYGFNLVMSHPHAVNEIALSLNNKNPRTKALVLELLAA  | 275 |
| WHIF1 | 101 | -----CVSCVRAVMNSRQGIEYILSNQGYVRQLSQALDTSNMVVKQVFEELAA                             | 149 |
| INF1  |     | -----                                                                             |     |
| FHOD1 | 180 | -----ILRALGQLMLFVDGMLGVVAHSDTIQWLYTLCASLSRLVVKTKALKLLLV                           | 228 |
| FHOD3 | 168 | -----ILRALGQIMLYVDGMNGVINRNETIQWLYTLIGSKFRLVVKTKALKLLLV                           | 216 |
| DELPH | 158 | -----VFAALKQF-----AAEQRVDDLVTTLT--ALPREACGPLLDNLRI                                | 196 |
| FMN1  |     | -----                                                                             |     |
| FMN2  |     | -----                                                                             |     |
|       |     |                                                                                   |     |
| DIA1  | 266 | LCILP---QPEDMNERVLEAMTE-RAEMDEVERFQPLLDGL----KSGTTIALKVGCLQLINALI---TPAEELDFRVH   | 333 |
| DIA2  | 295 | VCIVG---E-ESILEEVLEALTS-AGEEKKIDRFFCIVEGL----R-HNSVQLQVACMQQLINALV---TSPDDLDFRLH  | 360 |
| DIA3  | 282 | ICIVG---E-ENILDKLLGAITT-AAERNRERFSPIVEGL----ENQEALQVACMQFINALV---TSPYELDFRIH      | 348 |
| DAAM1 | 230 | VCLVP---G---GHKKVLQAMLHYQKYASERTRFQTLINDLDKSTGRYRDEVSLKTAIMSFINAVLSGAGVESLDFRLH   | 303 |
| DAAM2 | 226 | VCLVP---G---GHKKVLQAMLHYQVYAAERTRFQTLNELDRSLGRYRDEVNLKTAIMSFINAVLNAGAGEDNLEFRLH   | 299 |
| FRL1  | 279 | VCLVR---G---GHDIIILAAFDNFKEVCGEQHREKLEMEYFR----NEDSNIDFMVACMQFINIVV---HSVENMNFVVF | 345 |
| FRL2  | 273 | VCLVR---G---GHEIILSAFDNFKEVCGEKQRFKLEMEHFR----NEDSNIDFMVASMCFINIVV---HSVEDMNFVVF  | 339 |
| FRL3  | 276 | VCLVR---G---GHEIILAAFDNFKEVCKELHREKLEMEYFR----NEDSNIDFMVACMQFINIVV---HSVEDMNFVVF  | 342 |
| WHIF1 | 150 | LCIYS---P---EGHVLTLDALDHYKTVCSSQYRFSIVMNELS-----GSDNVPYVVTLLSVINAVI---LGPEDLRARTQ | 216 |
| INF1  |     | -----                                                                             |     |
| FHOD1 | 229 | FV-----EYSENNAPLFRIVANVSASTTGAPPWANLVSILEE---KNGADPELLVYTVTLINKTL---AALPDQDSFYD   | 296 |
| FHOD3 | 217 | FV-----EYSESNAPLLIQAVTAVDTKRGVKPWSNIMEILEE---KDGVDTELLVYAMTLVNKTL---SGLPDQDTFYD   | 284 |
| DELPH | 197 | FIPKXHRARFDEVVSQGLLGLKCRARRAQAQ---RLRRS---RSEERPERL---LVSTRA---SAPPRRP---         | 255 |
| FMN1  | 1   | -----MENVDNSLDGSDVSEPAKPE---AGLEVAQSILS                                           | 31  |
| FMN2  | 1   | -----MGNQDGKLRKRSAGDALHEGG---GGAEDALGPRD                                          | 31  |
|       |     |                                                                                   |     |
| DIA1  | 334 | IRSELMRLGLH-QVLQDLREIE-----NEDMRVQLNVFDEQG-EEDSYDLKGRLLDDI-                       | 383 |
| DIA2  | 361 | IRNEFMRCGLK-EILPNLKCIC-----NDGLDIQLKVFDEHK-EEDLFELSHRLEDI-                        | 410 |
| DIA3  | 349 | LRNEFLRSLGK-TMLPDLKEKE-----NDELDIQLKVFDEHK-EEDLTELSHRLNDI-                        | 398 |
| DAAM1 | 304 | LYEFLMLGIQ-PVIDKLRHE-----NSTLDRHLDFEMLR-NEDLEFEAKRFELV-                           | 353 |
| DAAM2 | 300 | LYEFLMLGIQ-PVIDKLRQHE-----NAILDKHLDFEMLR-NEDDLELARRFDMV-                          | 349 |
| FRL1  | 346 | LQYEFTHLGLD-LYLERLRLTE-----SDKLQVQIQAY-----                                       | 377 |
| FRL2  | 340 | LQYEFTHLGLD-EYLDKLRKHE-----SDKLQVQIQAY-----                                       | 371 |
| FRL3  | 343 | LQYEFTHLGLD-EFLQKSRHTE-----SEKLQVQIQAY-----                                       | 374 |
| WHIF1 | 217 | LRNEFIGLQLL-DVLARLRDLE-----DADLLIQLEAFEEAK-AEDEEELLR--VSG-                        | 264 |
| INF1  |     | -----                                                                             |     |
| FHOD1 | 297 | VTDALEQQGMEALVQRHLGTAG---TDVDLRTQLVLYENAL-----KLEDG-                              | 339 |
| FHOD3 | 285 | VVDCLLEELGIAAVSQRHLNKKG-----TDLDLVEQLNIYEVAL-----RHEDG-                           | 327 |
| DELPH | 256 | -----DEPPPRASLLVGGG-----A-----                                                    | 271 |
| FMN1  | 32  | KFSMKSLFG---FTSKLESVNPEEEDAVLKAHSLVDNPTSQQDDSSNGLDQAEAGSRVSPDLGNDEKIASVETESEGS    | 107 |
| FMN2  | 32  | VEATKKGSG---GKKALGKHGKGGGGGGGGESGKKKSKSDSRASVFSNLRIRKNLSKGGKAGGSREDVLDLSQLQGTG-   | 106 |
|       |     |                                                                                   |     |
| DIA1  | 384 | -----RMEMDDFN-----                                                                | 391 |
| DIA2  | 411 | -----RAELDEAY-----                                                                | 418 |
| DIA3  | 399 | -----RAEMDDMN-----                                                                | 406 |
| DAAM1 | 354 | -----HIDTKSAT-----                                                                | 361 |
| DAAM2 | 350 | -----HIDTKSAS-----                                                                | 357 |
| FRL1  | 378 | -----LDNIF-----                                                                   | 382 |
| FRL2  | 372 | -----LDNVF-----                                                                   | 376 |
| FRL3  | 375 | -----LDNVF-----                                                                   | 379 |
| WHIF1 | 265 | -----GVDMSHQ-----                                                                 | 272 |
| INF1  |     | -----                                                                             |     |
| FHOD1 | 340 | -----DIEEAPGAGGRERRRKP-----                                                       | 357 |
| FHOD3 | 328 | -----DETTEPPSGCDRRRARSVCSSGGG-----                                                | 352 |
| DELPH | 272 | -----GPGGARTRVRY-----                                                             | 283 |
| FMN1  | 108 | QRKEAGTSLLAQELLPLSTLKGTKDDVICVGR-----TLVHTTSDSDSDGGQPEEGS-STNGPK                  | 167 |
| FMN2  | 107 | ELDSAHSLLTKTPDLSLSADEAGLSDTECADPFEVTPGGGPAEARVGRPIAEDVETAAGQDQRTSSGS-DTDIYS       | 185 |

|       |     |                                                                                  |     |
|-------|-----|----------------------------------------------------------------------------------|-----|
| DIA1  | 392 | -EVFQILLNTV-----                                                                 | 401 |
| DIA2  | 419 | -DVYNM WVSTV-----                                                                | 428 |
| DIA3  | 407 | -EVYHLLYNML-----                                                                 | 416 |
| DAAM1 | 362 | -QMFELTRKRL-----                                                                 | 371 |
| DAAM2 | 358 | -QMFELIHKKL-----                                                                 | 367 |
| FRL1  | 383 | -DVGALLEDETE-----                                                                | 392 |
| FRL2  | 377 | -DVGALLEDAE-----                                                                 | 386 |
| FRL3  | 380 | -DVGALLEDAE-----                                                                 | 389 |
| WHIF1 | 273 | -EVFASLFHKV-----                                                                 | 282 |
| INF1  |     | -----                                                                            |     |
| FHOD1 | 358 | SEEGKRSRRSL-----EGGGCPARAPEPGPT                                                  | 383 |
| FHOD3 | 353 | EHRGLDRRRSR-----RHSVQSIKSTLSAPT                                                  | 378 |
| DELPH | 284 | --KGNKSGFT-----LRHGHPVWIESVLP                                                    | 307 |
| FMN1  | 168 | SPSGVLSEF-----SQESKENPGGFRENTVTGEMNGAELCAEDPQRIPPEMSSKLEAGNGGLQTERRPSQDQV        | 235 |
| FMN2  | 186 | FHSATEQEDLLSDIQQAIRLQQQQQQQLQLQLQQQQQQQLQGAEEPAAPPTAVSPQPGAFLGLDRFLLGPGSGGAGEAPG | 265 |
| DIA1  | 402 | --KDSKAEPHFLSILQHLLLRND-----YEARPQYYKLIIEC--                                     | 437 |
| DIA2  | 429 | --KETRAEGYFISILQHLLLRND-----YFIRQQYFKLIDEC--                                     | 464 |
| DIA3  | 417 | --KDTAAENYFLSILQHLLLRND-----YYIRPQYYKIIIEC--                                     | 452 |
| DAAM1 | 372 | --THSEAYPHFMSILHHCLQMPYKR-----SGNTVQYWLLLDRI--                                   | 408 |
| DAAM2 | 368 | --KYTEAYPCLLSVLHHCLQMPYKR-----NGGYFQQWQLLDRI--                                   | 404 |
| FRL1  | 393 | --TKNAVLEHMEELQEQQVALLTER-----LRD-----                                           | 417 |
| FRL2  | 387 | --TKNAALERVEELENISHLSEK-----LQD-----                                             | 411 |
| FRL3  | 390 | --TKNVALEKVEELEEHVSHLSEK-----LLD-----                                            | 414 |
| WHIF1 | 283 | --SCSPVSAQLLSVLQGLLHLEPT-----LRSSQLLWEALESL--                                    | 318 |
| INF1  |     | -----                                                                            |     |
| FHOD1 | 384 | GPASPVGPT-----SSTG-----                                                          | 396 |
| FHOD3 | 379 | SPCSQSAPSFKNQVRDLREKYSN-----FGNNSYHSSRPSSG----                                   | 416 |
| DELPH | 308 | SPADNAALKSGDRILFLNGLDMRN-----CSHDKVVSMLQSGSAM--                                  | 347 |
| FMN1  | 236 | GEEGSQDLPAVTNQNSSVG-----ITESASSKKEVSGEKSQLPAPFFSGLRVLKKGATAEG--                  | 291 |
| FMN2  | 266 | SPDTEQALSALSDLPESLAAEPREPQQPPSPGGLPVSEAPSLPAAQPAAKDSPSSTAFFPPEAGPGEAAAGAPVRGAGDT | 345 |
| DIA1  | 438 | -----ISQIVLHKN-GADPDFKCR-HLQIE-----IEGL                                          | 464 |
| DIA2  | 465 | -----VSQIVLHRD-GMDPDFTYRKRLDLD-----LTQF                                          | 492 |
| DIA3  | 453 | -----VSQIVLHCS-GMDPDFKYRQRDID-----LTHL                                           | 480 |
| DAAM1 | 409 | -----IQQIVIQNDKGGQDPDSTPLENFNIK-----NV                                           | 435 |
| DAAM2 | 405 | -----LQQIVLQDERGVDPDLAPLENFNVK-----NI                                            | 431 |
| FRL1  | 418 | -----AENE-----                                                                   | 421 |
| FRL2  | 412 | -----TENE-----                                                                   | 415 |
| FRL3  | 415 | -----LENE-----                                                                   | 418 |
| WHIF1 | 319 | -----VNRAVLLAS-----DAQ-----ECT                                                   | 333 |
| INF1  |     | -----                                                                            |     |
| FHOD1 | 397 | -----PALLTGPASSPVGP-----PSGLQASVNL                                               | 420 |
| FHOD3 | 417 | -----SSVPTTPTSSVSPQEARLERS-----SPSGLLTSSFR                                       | 449 |
| DELPH | 348 | -----PTLVVEEGLVPFASDSDSLDSP-----NPSSALTSLQW                                      | 380 |
| FMN1  | 292 | -----GETITEIKPKDGLLALLKLTQPVKSLVQAGLQTVKSEKATDPKA-----TPTLLEQLSLL                | 348 |
| FMN2  | 346 | DEEGEEDAFEDAPRGSPEGEWAPEVGEDAPQRLGEEPEEEAQGPDAPAAASLPGSPAPSORCFKPYPLITPCYIKTTTRQ | 425 |
| DIA1  | 465 | IDQMIDKTKVEKSEAK-----                                                            | 480 |
| DIA2  | 493 | VDICIDQAKLEEFEEK-----                                                            | 508 |
| DIA3  | 481 | IDSCVNKAKVEESEQK-----                                                            | 496 |
| DAAM1 | 436 | VRMLVNEVEVKQWKEQ-----                                                            | 451 |
| DAAM2 | 432 | VNMLINENEVKQWRDQ-----                                                            | 447 |
| FRL1  | 422 | -----SMAKIAELEKQ-----                                                            | 432 |
| FRL2  | 416 | -----AMSKIVELEKQ-----                                                            | 426 |
| FRL3  | 419 | -----NMMRVAELEKQ-----                                                            | 429 |
| WHIF1 | 334 | LEEYVERLLSVKGRPR-----                                                            | 349 |
| INF1  |     | -----                                                                            |     |
| FHOD1 | 421 | FPTI---SVAPSADTS-----SERSIY-----KARFL                                            | 444 |
| FHOD3 | 450 | QHQE---SLAERERRRQEREERLQRIER-----EERNKFSRDYLDKREEQRQA-----REERYKYL               | 503 |
| DELPH | 381 | VAEILPSSIRVQGRTFSSQLEHLLTPPERYGVCRALESFFQHRNIDTLIVDVYPVLDTPA-----KQVLWQFI        | 448 |
| FMN1  | 349 | LNIDMPKTEPKGADPESPREEM-----GCNADQESQSGPGVPTQGGEVKPKSPETALEAFKALFIRPPRKGTADT      | 421 |
| FMN2  | 426 | LS--SPNHSPSQSNQSPRIKRRPEPSLSRGSRTALASVAAPAKKHRADGGLAGLSRSA-DWTEELGARTPRVGGSAHL   | 502 |

|            |     |                                                                                   |     |
|------------|-----|-----------------------------------------------------------------------------------|-----|
| DIA1       | 481 | ----AAELEKKLDSELTA-----                                                           | 494 |
| DIA2       | 509 | ----ASELYKKFEKEFTD-----                                                           | 522 |
| DIA3       | 497 | ----AAEFSKKFDEEFTA-----                                                           | 510 |
| DAAM1      | 452 | ----AEKMRKE-----                                                                  | 458 |
| DAAM2      | 448 | ----AEKFRKE-----                                                                  | 454 |
| FRL1       | 433 | ----LSQARKELETLRER-----                                                           | 446 |
| FRL2       | 427 | ----LMQRNKELDVVREI-----                                                           | 440 |
| FRL3       | 430 | ----LLQREKELESIKET-----                                                           | 443 |
| WHIF1      | 350 | ----PSPLVKAHKSVQAN-----                                                           | 363 |
| INF1       |     | -----                                                                             |     |
| FHOD1      | 445 | ENVAAAETEKKV---ALA-----QGRA-----                                                  | 463 |
| FHOD3      | 504 | EQLAAEEHEKELRSRSVS-----RGRADLSLDLTSAPAACLAPLSH-----SPSSSDSQEAL                    | 556 |
| DELPH      | 449 | YQLLTYE-EQELCQEKIACFLG-----YTAMTAEPEPELDLESEPTPEP-QPRSS-----LRASSMCRRL            | 507 |
| FMN1       | 422 | SELEALKRKMREKESL-----RAVFERSNSKPADGPPSDS-----                                     | 456 |
| FMN2       | 503 | LERGVASDSGGVSPALAAKASGAPAAADGFQNVFTGRTLLEKLFSSQENGPPEAEKFCRSRIIAMGLLLPFSDCFREPC   | 582 |
| DIA1       | 495 | -----RHELVEMKKMESDFE                                                              | 510 |
| DIA2       | 523 | -----HQETQAELOKKEA---                                                             | 535 |
| DIA3       | 511 | -----RQEAQAELOKRDE---                                                             | 523 |
| DAAM1      | 459 | -----HNELQKKLEKKERECD                                                             | 474 |
| DAAM2      | 455 | -----HMELVSRLEKERECE                                                              | 470 |
| FRL1       | 447 | -----FSESTAMGASRRPPEP                                                             | 462 |
| FRL2       | 441 | -----YKDANTQVHTLRKMMVK                                                            | 456 |
| FRL3       | 444 | -----YENTSHQVHTLRRLIK                                                             | 459 |
| WHIF1      | 364 | -----LDQSQRGSSPQNTTTP                                                             | 379 |
| INF1       | 1   | -----MHVMN-----                                                                   | 5   |
| FHOD1      | 464 | -----ETLAGAMPNEAGG--                                                              | 476 |
| FHOD3      | 557 | TVSASSPGTPH-----HPQASAGDPEPES---EAEPEAEAGAGQVADEAGQDI                             | 601 |
| DELPH      | 508 | RSQGLEAGLSC-----GPSECEMPLPLI---PGE-----RQAGDG-                                    | 540 |
| FMN1       | 457 | -----KSPDHSLTEQDDRTPGRLQAVWPPPKTKDTEEKVGLKYTEAEYQAAILHLKREHKEEI                   | 514 |
| FMN2       | 583 | NQNAQTNAASFQDQLYTAAVVSQPTHSLDYSEGQFPRRVPSMGPPSKPPDEEHR--LEDAETESQSAVSETPQKRSDAV   | 660 |
| <b>FH1</b> |     |                                                                                   |     |
| DIA1       | 511 | QKIQ-----DLQGEKDALHSEKQATEKQDLEAEVSQLTGEVAK-----LTKELE                            | 556 |
| DIA2       | 536 | -KIN-----ELQAELOAFKSFQFAL-----                                                    | 554 |
| DIA3       | 524 | -KIK-----ELEAEIQQLRTQAQVL-----                                                    | 542 |
| DAAM1      | 475 | AKTQ-----EKEEMMQTLNKMKEKLEKETTEHK---QVKQQVAD-----LTAQL-                           | 515 |
| DAAM2      | 471 | TKTL-----EKEEMMRTLNMKMDKLAESQELR---QARGQVAE-----LVAQL-                            | 511 |
| FRL1       | 463 | EKAPP-----AAPTRPSALELKVLEELEKGL-----IR                                            | 490 |
| FRL2       | 457 | EKE-----EAIQRQSTLEKKIHELEKQGT-----IK                                              | 482 |
| FRL3       | 460 | EKE-----EAFQRRCHLEPNVRGLE-----                                                    | 479 |
| WHIF1      | 380 | KPSV-----EGQQPAAAAACEPVDHAQSESI-----LK                                            | 407 |
| INF1       | 6   | -----CV-----                                                                      | 7   |
| FHOD1      | 477 | -----HPDARQ-----                                                                  | 482 |
| FHOD3      | 602 | ASAH-----EGAETEVEQALEQEPEE-RASLSEKERQ-----NEGVNERDNCSASSV-----                    | 647 |
| DELPH      | 541 | TSLP-----ETPNPKMMSAVYAELES-RLNSSFKGKM-----GTVSKSRASPPGP-----                      | 584 |
| FMN1       | 515 | E NLQAQFELRAFHIRGEHAMITARLEETIENLKHELEHRWR-----GGCEERKDVCI-----                   | 566 |
| FMN2       | 661 | QK-----EVVDMKSEGG-ATVIQQLQETIEDLRKTKIAELERQYPALDTEVASGHQGLENGVTASGDVCLALRLEEKEVR  | 734 |
| DIA1       | 557 | -----DA-----                                                                      | 558 |
| DIA2       |     | -----                                                                             |     |
| DIA3       |     | -----                                                                             |     |
| DAAM1      |     | -----                                                                             |     |
| DAAM2      |     | -----                                                                             |     |
| FRL1       | 491 | -----IL-----                                                                      | 492 |
| FRL2       | 483 | -----IQ-----                                                                      | 484 |
| FRL3       |     | -----                                                                             |     |
| WHIF1      | 408 | -----VS-----                                                                      | 409 |
| INF1       |     | -----                                                                             |     |
| FHOD1      | 483 | -----LWD-----SPET                                                                 | 489 |
| FHOD3      | 648 | -----SSSSSTLEREEKEDKLSRDRRTTGLWPAGVQDAGVNGQ-----CGDIL--TNKRFMLDMLYAHN-----RKSPDD  | 709 |
| DELPH      | 585 | -----SPAVTTGPRTLGSVSWPSEER---LLSPCYHPLCSGG---LASPS--SSESHPYASLDSSR-----APSPQP     | 643 |
| FMN1       |     | -----                                                                             |     |
| FMN2       | 735 | HHRILEAKSIQTSPTTEGGVLTLPVPDGLPGRPPCPGAESGPQTKFCSEISLIVSPRRISVQLDSSHQPTQISISQPPPPP | 814 |



|       |      |                                                                                |     |
|-------|------|--------------------------------------------------------------------------------|-----|
| DIA1  | 640  | SPPPPLSGDATIPPPPPLPEGV-----GIPSPSSLPGGTAIPPPPPLPGSARIPP-PPP-LPGSA-GIPPPPPLPGEA | 711 |
| DIA2  | 573  | SAL-----PPPPPPLPSGG-----GVPPPPP-----PPPPPPLPG-MRM-P-FSGP-VP-----PPPLGFLGGQ     | 622 |
| DIA3  | 563  | PPP-----PPAPPLPGGA-----PL-----PPPPPPLGMMGI-P-PPP-PLLFGGPPPPPPLGG--             | 611 |
| DAAM1 | 526  | -----SIPGGPS-----PGAPGGP--FPSS-VPGSL-LPPPPPPLPGGM                              | 561 |
| DAAM2 | 520  | -----SS-----PPPPGGPLTLSSS-MTND-LPPPPPPLPFACC                                   | 552 |
| FRL1  | 551  | LPSP-----QEAPP-----SAPPQAPPLPGSPEPPP--APP-LPGDLPPPPPPPPPPGTD                   | 598 |
| FRL2  | 536  | SSDT-----PETVQ-----NGPV-TPPMPPPPPPPP-PPP-PP-----PPPPPPLPGPA                    | 578 |
| FRL3  | 508  | PAPP-----PEEVL-----PLPPPAPPL--PPP-PP-----PLPDKCPP-----                         | 539 |
| WHIF1 | 437  | PPP-----PPPPPPLSVGAKALPTAPPPPL-----PGLGAMAPPAPP-LPPP-LPGSCEFLPPPPPPLPLGL       | 498 |
| INF1  | 18   | IATAPGFMIGQTTPPPAPP-----PPPPPP-----SPPSCSREECPP-SSPP-PP-----PPPLPG--           | 68  |
| FHOD1 | 583  | PPPPP-----L-PPPPPIKGF-----PPPPPL-----PLAAP-LPHS-VPDS-----                      | 617 |
| FHOD3 | 858  | PPPPPPLLDLDS-IPPPVPGNLL-----VPPPPVF-----NAPQG-LGWSQVPRG-----                   | 900 |
| DELPH | 768  | -KPSRSSDGSRGPAQALAKPLTQLSHVPPPPPP-----PP-LPPP-VPCA-----PPMLSR--                | 816 |
| FMN1  | 665  | LSAPPMPVVSAGPPLPPP-----PPPPPL-----PPSSAGPPPPP-PPP-LPN-----SPAPPNP--            | 717 |
| FMN2  | 1118 | IPPPPPLPGAGIPPPPPLPGAGI----PPPPPLPRVG-----                                     |     |

|       |      |                                                                            |      |
|-------|------|----------------------------------------------------------------------------|------|
| DIA1  | 712  | GMPPPPPPLPGGPGIPPPP-----FPGGPGIP-----PPPPGMGMPPPP-----PFGFVPA-----         | 760  |
| DIA2  | 623  | NSPPLP-----                                                                | 628  |
| DIA3  | 612  | -VPPPGI-----S-----                                                         | 619  |
| DAAM1 | 562  | LPPPPPPLPGGPPPPPGPP-----P-LGAIMP-----PP---GAPM-----GLA-----                | 597  |
| DAAM2 | 553  | PPPPPPLPGGPPPTPGAP-----PCLGMGLP-----LP---QDPYPS-----S---DVP-----           | 592  |
| FRL1  | 599  | GPVPPP--PPPPPPPGGPP-----DALG-----RRD-----S-----ELGPG-----                  | 629  |
| FRL2  | 579  | AETVPA--PPLAPPLPSAPP-----L--PGTS-----SPT-----V-----VFNSGLA-----            | 612  |
| FRL3  | 540  | -----APP-----L--PG-A-----APS-----V-----VLTVGLS-----                        | 557  |
| WHIF1 | 499  | CPPPPPLPGMGWGP PPPP-----PPLLCTC-----SPPV--AGGMEE-----VIVAQVDHG-----        | 545  |
| INF1  | 69   | -EPIP--PPPPGL-PP-----                                                      | 81   |
| FHOD1 |      | -----                                                                      |      |
| FHOD3 |      | -----                                                                      |      |
| DELPH | 817  | -----GLG-----                                                              | 819  |
| FMN1  | 718  | -GPPA--PPPPGLAPPPP-----                                                    | 734  |
| FMN2  | 1184 | IPPPP--LPGVGIPPPPLPGAGIPPPPPLPGMGIAPPAPPLPPPGTGIPPPPLPVSGPPLLQVGSSTLPTQVCG | 1261 |

|       |      |                                                                                      |      |
|-------|------|--------------------------------------------------------------------------------------|------|
| DIA1  | 761  | ---PVLPGFLT-----PKKLYKPEVQLRRPNWSK <b>LVAEDLS</b> Q-DC-----FWTKVKEDRFEN-NELFAK-      | 814  |
| DIA2  | 629  | ---ILPGLK-----PKKEFKPEISMRRLNWLK <b>IRPHEMT</b> E-NC-----FWIKVNEKNYEN-VDLLCK-        | 681  |
| DIA3  | 620  | ---LNLPGYMK-----QKKMYKPEVSMKRINWS <b>KIEPT</b> ELSE-NC-----FWLRVKEDKFEN-PDLFAK-      | 673  |
| DAAM1 | 598  | -----LK-----KKSIPQPTNALKSFNWSKL <b>PENKLE</b> --GT-----VWTEIDDTKVFK-ILDLED-          | 644  |
| DAAM2 | 593  | -----LR-----KKRVPQSPHPLKSFNWVWKLNE <b>ERVV</b> --GT-----VWNEIDDMQVFR-ILDLED-         | 639  |
| FRL1  | 630  | -----VK-----AKKPIQTKFRMPLLNWV <b>ALKPSQIT</b> --GT-----VFTELNDEKVLQ-ELDMSD-          | 676  |
| FRL2  | 613  | -----AVK-----IKKPIKTKFRMPVFNWV <b>ALKPNQIN</b> --GT-----VFNEIDDERILE-DLNVD-          | 660  |
| FRL3  | 558  | -----AIR-----IKKPIKTKFRMPVFNWV <b>ALKPNQIS</b> --GT-----VFSELDDKILE-DLDDK-           | 605  |
| WHIF1 | 546  | ---LGSAWVPS-----HRRVNPPTLRMKLNWQK <b>LPSNVARE</b> HNS-----MWASLSSPDAAEAVEPDFSS-      | 601  |
| INF1  | 82   | -----TTHMNGYSHLGGKKRMSFFWK <b>TIP</b> --EEQVRGKTN-----IW <b>TAAAR</b> QEHYQ-IDTKT-   | 133  |
| FHOD1 | 618  | -----S-ALPTKRKTVKLFW <b>RELKLAG</b> GHGVSASRFGPCAT-LWASLDVSV-----DTAR-               | 666  |
| FHOD3 | 901  | -----QPTFTKKKKTIRLFWNEVPFDWPCCKNNRR-- <b>CREFLW</b> SKLEPIKV-----DTSR-               | 948  |
| DELPH | 820  | -----HRRSETSHMS <b>VKRLRWEQ</b> VENSE <b>GT</b> -----IW <b>QLG</b> EDSDYDKLSDMVKY    | 864  |
| FMN1  | 735  | -----GLFFGLGSSSSQCPRKPAIEPSCPMP <b>PLYWTRI</b> QISDRSQNATPT-----LWDSLEEPDIRDP-SEFEY- | 797  |
| FMN2  | 1262 | FLPPPLPSGLF-GLGMNQDKGSRKQPIEPCRP <b>MYWTR</b> IQLHSKRDSSTSL-----IWEKIEEPI-DC-HEFEE-  | 1330 |

**FH2**

|       |      |                                                                                                                           |      |
|-------|------|---------------------------------------------------------------------------------------------------------------------------|------|
| DIA1  | 815  | --LTLTFSAQTKTS-----KAKKDQEGGEEKS-VQKKVKELKVLDSKTAQNLSIFLGSFRMPYQEIKNVILEVNEA                                              | 884  |
| DIA2  | 682  | --LENTFCCQKER-----RE---EEDIEEKS--IKKKIKELKFLDSKIAQNLSIFLSSFRVPEEIRMMILEVDET                                               | 747  |
| DIA3  | 674  | --LALNFATQIKVQ-----KN---AEALEEKTGPTKKVKELRLILDPKTAQNLSIFLGSYRMPYEDIRNVILEVNE                                              | 741  |
| DAAM1 | 645  | --LERTFSAYRQDDFFVNSNSKQKEADAIDT <b>LS</b> --SKLKVKELSVIDGRRQNCNILLSRLKLSNDEIKRA <b>ITMDEQ</b>                             | 720  |
| DAAM2 | 640  | --FEKMFAYQRHQ-----KELGSTEDIYL--ASRKVELSVIDGRRQNCIILLSKLSNDEIRQA <b>ILKMDQ</b>                                             | 705  |
| FRL1  | 677  | --FEEQFKTKSQGP-----SLDLSALKSKAA--QKAPSKATLIEANRAKNLAITLRKGNLGAERICQAI <b>EAYDLQ</b>                                       | 742  |
| FRL2  | 661  | --FEEIFKTKAQGP-----AIDLSSSKQKIP--QKGSNKVTLLEANRAKNLAITLRKAGKTADE <b>ICKAIHVF</b> DLK                                      | 726  |
| FRL3  | 606  | --FEELFKTKAQGP-----ALDLCSKNKTA--QKAASKVTLLEANRAKNLAITLRKAGRS <b>AEIICRAIHTF</b> DLQ                                       | 671  |
| WHIF1 | 602  | --IERLFSFPAKP-----KEPTMVAPRARKEPKEITFLDAKKS <b>LNLNIFLQFKCSN</b> EEVAAMIRAGDTT                                            | 665  |
| INF1  | 134  | --IEELFGQEDTT-----KSSLPRGRGRTLNS <b>FEAREE</b> ITILDAKRSMNIGIFLQFKKSPRS <b>IVEDIHQ</b> GKSE                               | 202  |
| FHOD1 | 667  | --LEHLFESRAKEV-----LPS-----KK-AGEG-RRTMTTVLDPKRSNAINIGLTT <b>L</b> -PPVHV <b>IKAA</b> LLNFDEF                             | 726  |
| FHOD3 | 949  | --LEHLFESKSKEL-----SVS-----K <b>TAADG</b> -KRQ <b>EI</b> IVLDSKRSNAINIGLTVL-PP <b>RTIKIA</b> ILNFDEY                      | 1009 |
| DELPH | 865  | LDLELHFGTKPAK-----VVP-----G <b>P</b> -EP <b>R</b> -K <b>KEVVE</b> ILSHKKAYNTS <b>ILLAH</b> LKLS <b>PAELRQ</b> VMSLEPR     | 927  |
| FMN1  | 798  | --LFSKDTTQKKK-----PLS-----E <b>TYE</b> KK <b>KN</b> --V <b>KKI</b> IKLLDGKRSQ <b>TVG</b> ILISSLH <b>LEMKDIQQA</b> IFNVDDS | 860  |
| FMN2  | 1331 | --LFSKTA <b>VKERK</b> -----PIS--DTIS <b>KTKA</b> --K <b>QVVK</b> LLSNKRSQ <b>AVG</b> ILMSSLH <b>LDMKDIQ</b> HAVVNLDS      | 1392 |

DIA1 885 V-LTESM QNLIKQMPPEPEQLKMLSEL---KDE---YDDLAESEQFGVVMGTVPRLRPRLNAILFKLQFSEQVENIKPEI 957  
DIA2 748 R-LAESMI QNLIKHLPDQEQLNLSLQF---KSE---YSNLCEPEQFVVMNSVKRLRPRLSAILFKLQFEEQVNNIKPDI 820  
DIA3 742 M-LSEALIQ NLVKHLPEQKILNELAEL---KNE---YDDLCEPEQFGVVMSSVKMLQPRSSILFKLTFEEHNNIKPSI 814  
DAAM1 721 EDLFKDMLEQLLKFVPEKSDIDLLEE---KHE---LDRMAKADRFLFEMSRIDHYQQRLQSLYFKKKFAERVAEVKPKV 794  
DAAM2 706 EDLAKDMI EQLLKFIPKSDIDLLEE---KHE---IERMARADRFLYEMSRIDHYQQRLQALFFKKKQFQERLAEAKPKV 779  
FRL1 743 A-LGLDFLELLMRFLPTEYERSLITRF---EREQRPMEELSEEDRFMLCFSRIPRLPERMTTLTFLGNFPDQAQLLMPQL 818  
FRL2 727 T-LPVDFVECLMRFLPTENEVKLRLY---ERERKPLENLSDEDRFMMQFSKIERLMQKMTIMAFIGNFAESI QMLTPQL 802  
FRL3 672 T-LPVDFVECLMRFLPTEAEVKLLRQY---ERERQPLEELAAEDRFMLLFSKVERLTQRMAGMAFLGNFQDNLQMLTPQL 747  
WHIF1 666 K-FDVEVLKQLLKLLEPKHEIENLRAF---TEE---RAKLASADHFYLLLLAIPCYQLRIECMLLCEGAAAVLDMVRPKA 738  
INF1 203 H-YGSETI REFLKFLPESEEVKLLKAF---SGDVSKLSLADSFYGLIQVPNYSLRIEAMVLKKEFLPSCSSLYTDI 275  
FHOD1 727 A-VSKDGIEKLLTMMPTEEERQKIEEA---QLANPDIPLGPAENFLMTLASIGGLAARLQLWAFKLDYDSMEREIAEPL 801  
FHOD3 1010 A-LNKEGIEKILTMIPTDEEKQKIQEA---QLANPEIPLGSAEQFLTLTSSISELSARLHLWAFKMDYETTEKEVAEPL 1084  
DELPH 928 R-LEFAHLAQLLTFAPDADEEQRYQ---AFREAPGRLLSEPDQFVLCQMLSVPEYKTRLRSLHFQATLQEKTEEIRGSL 1000  
FMN1 861 V-VDLETLAALYENRAQDEDELVKIRKYETSK---EELKLLDKPEQFLHELAQIPNFAERAQCIIFRSVFSEGITSLHRKV 938  
FMN2 1393 V-VDLETQALYENRAQSDLEKIEKHGRSSKDKENAKSLDKPEQFLYELSLIPNFSERVFICILFQSTFSESICSI RRKL 1471

DIA1 958 VSVTAACEELRKSSESFSNLEITLLVGNMAGSRN-AGAFGNISFLCKLRDTKST-DQKMTLLHFLAELCEN-----D 1030  
DIA2 821 MAVSTACEEIKKSKSFSKLELVLMLGNMAGSRN-AQTFGNLSSLCKLKDTKSA-DQKMTLLHFLVEICEE-----K 893  
DIA3 815 IAVTLACEELKKSSESFNRLLELVLGNMAGSRN-AQSLGKFINFLCKIRDTKSA-DQKMTLLHFIADICEE-----K 887  
DAAM1 795 EAIRSGSEEVFRSGALKQLLEVVLAFGNMNGQR--GNAYGFKISSLNKIADTKSSIDKNI TLLHYLITIVEN-----K 867  
DAAM2 780 EAILLASRELVRSKRLRQMLEVILAIGNFMNGQR--GGAYGFRVASLNKIADTKSSIDRNI SLLHYLIMILEK-----H 852  
FRL1 819 NAI IAASMSIKSSDKLRQILEIVLAFGNMNSKR--GAYGFRQLQSLDALLEMKST-DRKQTL LHYLVKVAIE-----K 890  
FRL2 803 HAI IAASVSIKSSQKLLKILEI IALGNMNSKR--GAVYGFKLQSLDLDLDTKST-DRKQTL LHYLSNVVKE-----K 874  
FRL3 748 NAI IAASASVKSSQKLLKQMLEI IALGNMNSKR--GAVYGFKLQSLDLDLDTKST-DRKMTLLHFIALTVKE-----K 819  
WHIF1 739 QLVLAACESLLTSRQLPIFCQLILRIGNFLNYGSH-TGDADGFKISTLLKLTETKSQ-QNRVTL LHHVLEEEAEK-----S 811  
INF1 276 TVLRTAIKELMSCEELHSILHLVLQAGNIMNAGGYA-GNAVGFKLSSLLKLADTKAN-KPGMNL LHFVAQEAQK-----K 348  
FHOD1 802 FDLKVGMEQLVQNFRCILATLAVGNFLNGSQ-----SSGFELSYLEKVSVEKDT-VRRQSL LHHLCSLVLQ-----T 870  
FHOD3 1085 LDLKEGIDQLENNKTLGFI LSTLLAIGNFLNGTN-----AKAFELSYLEKVSVEKDT-VHKQSL LHHVCTMVE-----N 1153  
DELPH 1001 ECLRQASLELKNRKLAKILEFVLAMGNVLDGQPKTKNTTGFKINFLTELNSTKTV-DGKSTFLHILAKLSLQ-----H 1074  
FMN1 939 EII TRASKDLLHVKSVDILALILAFGNMNGNRTRGQADGYSLEI LPKLDVKVSR-DNGINLV DYVVKYLYRYDQEA 1017  
FMN2 1472 ELLQKLCETLKNQGVMLVGLVLAFGNVMNGNKRTRGQADGFLDILPKLDVKVSS-DNSRSL LSYIVSYLRNFDEDA 1550

DIA1 1031 YPDVLKFP-DELAHVEKASRVSAENLQKNLDQMKQI SDVERDVQNFPA--ATDEKDKFVEKMTSFVKDAQEQYNKL RMM 1107  
DIA2 894 YPDILNFV-DDLEPLDKASKVSVETLEKNLRQMGRLQOLEKELETFFP--PEDLHDKFVTKMSRFTVISAKEQYETLSKL 970  
DIA3 888 YDLILKFP-EELEHVESASKVSAQILKNLNASMEQQIVHLERDIKKFPQ--AENQHDKFVEKMTSFTTAREQYKELSTM 964  
DAAM1 868 YPSVLNLN-EELRDI PQAQKVNMTELDKEISTLRSGLKAVETELEYQKSQ-PPQPGDKFVSVVSQFITVASFSFSDVEDL 945  
DAAM2 853 FPDILNMP-SELQHLPEAAKVNLALEKEVEGNLRRGLRAVEVELEYQRRQ-VREPSDKFVPMVSDFITVSSFSFSELEDQ 930  
FRL1 891 YPQLTGPH-SDLHFLDKAGSVSLDSVLADVRSLQRGELTQREFVRQD-----CMVLKEFLRANSP TMDKLLAD 959  
FRL2 875 YHQVSLFY-NELHYVEKAAAVSLENVLLDVKELGRGMDLTKRYETMHDH-----NTLLKEFILLNNEGKLLKQLDQ 943  
FRL3 820 YPDLANFW-HELHFVEKAAAVSLENVLLDVKELGRGMDLTKRYETMHDH-----NSVLRNFLSTNEGKLDKLRD 887  
WHIF1 812 HPDLLQLP-RDLEQPSQAAGINLEI IRSEASSNLKLLLETERKVSASVA---EVQEQYTERLQASISA---FRALDEL 882  
INF1 349 DTILLNFS-EKLHHVQKTARLSLENTEAELHLLFVRTKSLKENIQRDGE-----LCQQMEDFLQFAIEKLRLELCW 418  
FHOD1 871 RPESSDLY-SEI PALTRCAKVDQFDELQENLQLEERRSRAAEESLRS LAK---HELAPALRRLTHFLDQCARRVAMLRIV 946  
FHOD3 1154 FPDSSDLY-SEI GAITRSKVDQFQDQDNLQCMERRCKASWDHLKAIK---HEMKPVLKQRMSEFLKDC AERI I ILKIV 1229  
DELPH 1075 FPPELLGFA-QDLP TVPLAAKVNQALTSDLADLHGTISEIQDACQSISP---SSEDKFAMVMSFLETAQPALRALDGL 1149  
FMN1 1018 GTEKSVFPLPEPQDFFLASQVKFEDLIKDLRKLKRLQLEASEKQMVVVKCESPKYEQPFKDKLEEFFQAKKHEKMEESH 1097  
FMN2 1551 GKEQCLFPLPEPQDLFQASQMKFEDFQKDLRKLKLDLKA CEVEAGKVYQVSSKEHMQP FKENMEQFI IQAKIQEAEENS 1630

DIA1 1108 HSNMETLYKELGEYFLDFPKK----LSVEEFFMDLHNFNMFLQAVKEN-QKRRETEEKMRRAKLAKEA----- 1172  
DIA2 971 HNMKELYQSIIGYYAIDVKK----VSVEDFLTDLNNFRITTFMQAIKEN- IKKREAEKEKRVRIAKELA----- 1035  
DIA3 965 HNNMMKLYENLGEYFIFDSKT----VSEIEFFGLDNNFRTLFLEAVREN-NKRREMEKTRRAKLAKEA----- 1029  
DAAM1 946 LAEAKDLFTKAVKHFGEEAGK----IQPDEFFGIFDQFLQAVSEAKQENENMRKKKEEERRARMEALQK----- 1011  
DAAM2 931 LNEARDKFAKALMHFGEDSK----MQPDEFFGIFDQFLQAVSEARQDLEAMRRRKEEERRARMEAMLK----- 996  
FRL1 960 SKTAQEAFAFESVVEYFGENPKT----TSPGLFFSLFSRFIKAYKKAQEV-EQWKK-EAAAQEA GADTPGKGEPPAPKSP 1033  
FRL2 944 AKIAQEAADFDDVVKYFGENPKT----TPPSVFFVVFVRFVVKAYKQAEEN-ELRKKQEALMEKLLQEALMEQD PKSPS 1018  
FRL3 888 AKTAAEAYNAVVRVYFGESPKT----TPPSVFFVVFVRFVRSYKAEQEN-EARKKQEVMEVREKQLAQEA--KKLD AKTPS 960  
WHIF1 883 FEAEIQKQRELADYLCEDAQQ----LSLEDTFSTMKAFRDLFLRALKEN---KDRKEQAAKAERRKQQLA----- 945  
INF1 419 KQELQDEAYTLIDFFCEDKKT----MKLDECQFQIFRDFCTKFNKAVKDN--HDREAQELRQLQLRLEKEQ-QKRSWATGE 491  
FHOD1 947 HRRVCNRFHAFLLYLGYPQAA-REVRIMQFCHTLREFALEYRTCRERV--LQQQKQATYRERNKTRGR-MITE--TEK 1020  
FHOD3 1230 HRRIRNRFHSFLLFMGHPYAI-REVNINKFCRI ISEFALEYRTTRERV--LQQKQKRANHRRERKTRGR-MITD--SGK 1303  
DELPH 1150 QREAMEELGKALAFFGEDSKA----TTSEAFFGIFAEFMSKF----ERA--LSDLQA-----GE-GLRS--SGM 1205  
FMN1 1098 LENAQKSFETTVRYFGMKPKSGEKIEITPSYVFMVWYEFCSDFK----- 1140  
FMN2 1631 LTETHKCFLETTAYFFMKPKLGEKEVSPNAFFS IWHFESSDFK----- 1673

|       |      |                                                                                   |      |
|-------|------|-----------------------------------------------------------------------------------|------|
| DIA1  | 1173 | -----EKERLEKQKREQLIDMNAEGDETVGMDSLLEALQSGAAF-----R--RKRGRPQA-----                 | 1221 |
| DIA2  | 1036 | -----ERERLERQKKKRLLEMKTEGDETVGMDNLLLEALQSGAAF-----RDRRKRTMPKDVRSLSFMSQRV          | 1100 |
| DIA3  | 1030 | -----EQEKLERQKKKQLIDINKEGDETVGMDNLLLEALQSGAAF-----RDRRKRI PR-----                 | 1078 |
| DAAM1 | 1012 | -----EQRERERKMRKAK-----ENSEESGEFDDLVSALRSGEVFDKDLCKL--KRNKRITNQM----TDSSRERPI     | 1073 |
| DAAM2 | 997  | -----EQRERERWQRQKVLAAAGSSLEEGGEFDDLVSALRSGEVFDKDLCKL--KRSRKRSGSQA----LEVTRERAI    | 1063 |
| FRL1  | 1034 | -KARRPQMDLISELKRRQKQKEPLIYESDRDGAIEDIITVIKTVPFT-----A--RTGKRTS--RLLCEASL----GHEM  | 1098 |
| FRL2  | 1019 | HKSKRQQQELIAELRRRQVKDNRHVYEGKDGAIEDIIITDLRNQPYR-----R--ADAVRRSVRRRFDQNLRSVNGAEI   | 1090 |
| FRL3  | 961  | QRNKWQQQELIAELRRRQAKEHRPVYEGKDGTIEDIIITVLKSVPFT-----A--RTAKRGS--RFFCD----AAHDES   | 1026 |
| WHIF1 | 946  | -----EEEARRPRGEDGKPVKPGKQEEVVCVIDALLADIRKGFQLRKTA-----RGRGDTGGSKAASMDPPRATEP      | 1013 |
| INF1  | 492  | LGAFGRSSSENDVELLTKKAEG-----LLPFLHPRPISPSSPSYRPPNTRRSRLSLGPSADRELLTFLESST          | 559  |
| FHOD1 | 1021 | FSGVAGEAPSNPSVPVAVSSGPRGDADSHASKSLL-TSRP--EDTT-----HNRRSRGMVQSSSP--IMPTVGPST      | 1088 |
| FHOD3 | 1304 | FSG---SSPAPPSQPGLSYAE---DAAEHENMKAVLKTSSPSVEDATPALGVTRRSRASRGSTSSW-----T          | 1365 |
| DELPH | 1206 | VSPLAW-----                                                                       | 1211 |
| FMN1  |      | -----                                                                             |      |
| FMN2  |      | -----                                                                             |      |
|       |      |                                                                                   |      |
| DIA1  | 1222 | -----NRKAGCAVTSLLASELTKDDAMAAPAKVSKNSETFPTI-----LEEAKELVGRAS-----                 | 1272 |
| DIA2  | 1101 | LKVCNHNQKQVQLTEGSRSHYNINCNSTRTPVAKELNYNLDTHSTGRIKAAEKKEACNVESNRKKETELLSFSKNEV     | 1180 |
| DIA3  | 1079 | ---NPDNRRVPL-ERSRSRHN-----GAISSK---                                               | 1101 |
| DAAM1 | 1074 | TKL-NF-----                                                                       | 1078 |
| DAAM2 | 1064 | NRL-NY-----                                                                       | 1068 |
| FRL1  | 1099 | PL-----                                                                           | 1100 |
| FRL2  | 1091 | TM-----                                                                           | 1092 |
| FRL3  | 1027 | NC-----                                                                           | 1028 |
| WHIF1 | 1014 | VATSNPAGDPVGVSTRCASEPGLDATTASESRGWDLVDAVTPGPQP-TLEQLEEGGPRPLERRSSWYVDASDLTTEDPQ   | 1092 |
| INF1  | 560  | GSPEEPNK-----FHSLPRSSPRQARPTIA--CLEPAEVRHQDSSFAHK---PQASGGQEEAPNPPSAQAHLA         | 623  |
| FHOD1 | 1089 | ASPEEPPGSSLPDTSDEIMDLLVQSVTKSSPRALA--ARERKRSRGNRKSRLRRT---LKSGLDLVLQALGLSKGPGLE   | 1163 |
| FHOD3 | 1366 | MGTDDSP--NVTDDAADEIMDRIVKSATQVPSQRVV--PRERKRSRANRKSRLRRT---LKSGLTPEEARALGLVGTSELQ | 1438 |
| DELPH |      | -----                                                                             |      |
| FMN1  |      | -----                                                                             |      |
| FMN2  |      | -----                                                                             |      |
|       |      |                                                                                   |      |
| DIA1  |      | -----                                                                             |      |
| DIA2  | 1181 | PEVEALLARLRAL-----                                                                | 1193 |
| DIA3  |      | -----                                                                             |      |
| DAAM1 |      | -----                                                                             |      |
| DAAM2 |      | -----                                                                             |      |
| FRL1  |      | -----                                                                             |      |
| FRL2  |      | -----                                                                             |      |
| FRL3  |      | -----                                                                             |      |
| WHIF1 | 1093 | CPQPLEGAWPVTLGDAQALKPLKFSNQPPAAGSSRQDAKDPTSLGLVLAQAEADSTSEGLEDAVHSRGARPPAAGPGGDE  | 1172 |
| INF1  | 624  | AAQPENHASAFPRARRQGVSVLRKRYSEPVSLGSAQSPPLSPLAL-GIKEHEL-VTGLAQFNLQGSQGMETSQTLTSLDF  | 701  |
| FHOD1 | 1164 | V-----                                                                            | 1164 |
| FHOD3 | 1439 | L-----                                                                            | 1439 |
| DELPH |      | -----                                                                             |      |
| FMN1  |      | -----                                                                             |      |
| FMN2  | 1674 | -----DF-----                                                                      | 1675 |
|       |      |                                                                                   |      |
| DIA1  |      | -----                                                                             |      |
| DIA2  |      | -----                                                                             |      |
| DIA3  |      | -----                                                                             |      |
| DAAM1 |      | -----                                                                             |      |
| DAAM2 |      | -----                                                                             |      |
| FRL1  |      | -----                                                                             |      |
| FRL2  |      | -----                                                                             |      |
| FRL3  |      | -----                                                                             |      |
| WHIF1 | 1173 | DEDEEDTAPESALDTSLDKSFSEDAVTDSSSGTLPRARGRASKGTGKRKRKRSRSQEEVPPDSDDNKTKKLCVIO---    | 1249 |
| INF1  | 702  | SPMELESVGHGRG-PQSLASASSSLTPMGRDALGSLSPALEDGKAAPDEPGSAAALGSGVSSDPENKDPRLFCISDTTDCS | 780  |
| FHOD1 |      | -----                                                                             |      |
| FHOD3 |      | -----                                                                             |      |
| DELPH |      | -----                                                                             |      |
| FMN1  |      | -----                                                                             |      |
| FMN2  |      | -----                                                                             |      |



|       |      |                                                                                  |      |
|-------|------|----------------------------------------------------------------------------------|------|
| DIA1  |      | -----                                                                            |      |
| DIA2  |      | -----                                                                            |      |
| DIA3  |      | -----                                                                            |      |
| DAAM1 |      | -----                                                                            |      |
| DAAM2 |      | -----                                                                            |      |
| FRL1  |      | -----                                                                            |      |
| FRL2  |      | -----                                                                            |      |
| FRL3  |      | -----                                                                            |      |
| WHIF1 |      | -----                                                                            |      |
| INF1  | 781  | LTLDCSEGTDSRPRGGDPEEGEGDGSMSGSGVEMGDSQVSSNPTSSPPGEAPAPVSVSDSEPSCKGGLPRDKPTKRKDVV | 860  |
| FHOD1 |      | -----                                                                            |      |
| FHOD3 |      | -----                                                                            |      |
| DELPH |      | -----                                                                            |      |
| FMN1  |      | -----                                                                            |      |
| FMN2  |      | -----                                                                            |      |
|       |      |                                                                                  |      |
| DIA1  |      | -----                                                                            |      |
| DIA2  |      | -----                                                                            |      |
| DIA3  |      | -----                                                                            |      |
| DAAM1 |      | -----                                                                            |      |
| DAAM2 |      | -----                                                                            |      |
| FRL1  |      | -----                                                                            |      |
| FRL2  |      | -----                                                                            |      |
| FRL3  |      | -----                                                                            |      |
| WHIF1 |      | -----                                                                            |      |
| INF1  | 861  | APKRGSLKEASPGASKPGSARRSQGAVAKSVRTLTAENESMRKVMPITKSSRGAGWRRPELSSRGPSQNPPSSTDTVWS  | 940  |
| FHOD1 |      | -----                                                                            |      |
| FHOD3 |      | -----                                                                            |      |
| DELPH |      | -----                                                                            |      |
| FMN1  | 1141 | -----TIWK                                                                        | 1144 |
| FMN2  | 1676 | -----WK                                                                          | 1677 |
|       |      |                                                                                  |      |
| DIA1  |      | -----                                                                            |      |
| DIA2  |      | -----                                                                            |      |
| DIA3  |      | -----                                                                            |      |
| DAAM1 |      | -----                                                                            |      |
| DAAM2 |      | -----                                                                            |      |
| FRL1  |      | -----                                                                            |      |
| FRL2  |      | -----                                                                            |      |
| FRL3  |      | -----                                                                            |      |
| WHIF1 |      | -----                                                                            |      |
| INF1  | 941  | RQNSVRRASTGAEEQRLPRGSSGSSSTRPGRDVPLQPRGSFKKPSAKPLRNLPQKPEENKTCRAHSEGPESPKKEEPKTP | 1020 |
| FHOD1 |      | -----                                                                            |      |
| FHOD3 |      | -----                                                                            |      |
| DELPH |      | -----                                                                            |      |
| FMN1  | 1145 | RE-----SKNISKERL-----KMAQESVSKLTSEKKVETK-----                                    | 1174 |
| FMN2  | 1678 | KENKL-----LLQERV-----KEAEEVCRQKKGKSLY-----                                       | 1704 |
|       |      |                                                                                  |      |
| DIA1  |      | -----                                                                            |      |
| DIA2  |      | -----                                                                            |      |
| DIA3  |      | -----                                                                            |      |
| DAAM1 |      | -----                                                                            |      |
| DAAM2 |      | -----                                                                            |      |
| FRL1  |      | -----                                                                            |      |
| FRL2  |      | -----                                                                            |      |
| FRL3  |      | -----                                                                            |      |
| WHIF1 |      | -----                                                                            |      |
| INF1  | 1021 | SVPSVPHELPRVPSFARNTVASSSRSMRTDLPVAKAPGITRTRVTSRQQLRVKGDPEAAPKDSSTLRRASSARAPKKRPE | 1100 |
| FHOD1 |      | -----                                                                            |      |
| FHOD3 |      | -----                                                                            |      |
| DELPH |      | -----                                                                            |      |
| FMN1  |      | -----                                                                            |      |
| FMN2  |      | -----                                                                            |      |

|       |      |                                            |      |
|-------|------|--------------------------------------------|------|
| DIA1  |      | -----                                      |      |
| DIA2  |      | -----                                      |      |
| DIA3  |      | -----                                      |      |
| DAAM1 |      | -----                                      |      |
| DAAM2 |      | -----                                      |      |
| FRL1  |      | -----                                      |      |
| FRL2  |      | -----                                      |      |
| FRL3  |      | -----                                      |      |
| WHIF1 |      | -----                                      |      |
| INF1  | 1101 | SAEGPSANTEAPLKARGAGERASLRRKDSRRTLGRILNPLRK | 1143 |
| FHOD1 |      | -----                                      |      |
| FHOD3 |      | -----                                      |      |
| DELPH |      | -----                                      |      |
| FMN1  | 1175 | -----KINPTASLKER-----LRQKEASVTN-----       | 1196 |
| FMN2  | 1705 | -----KIKPR---HDSGIKAKISMKT-----            | 1722 |
